# Supplementary material
Source: PubMed Central journal article supplement (PMC5921080)

## **Using the shared genetics of dystonia and ataxia to unravel their pathogenesis**

Esther AR Nibbeling<sup>1</sup>, Cathérine CS Delnooz<sup>2</sup>, Tom J de Koning<sup>1,2</sup>, Richard J Sinke<sup>1</sup>, Hyder A Jinnah<sup>3</sup>, Marina AJ Tijssen<sup>2</sup>, and Dineke S Verbeek<sup>1</sup>

**Supplementary Figure 1. Gene co-expression network based on known SCA genes.** Red dots are the input genes (known SCA genes). Yellow to green dots represent co-expressed genes, darker colored dots have more connections. The thickness of the line indicates the strength of co-expression.

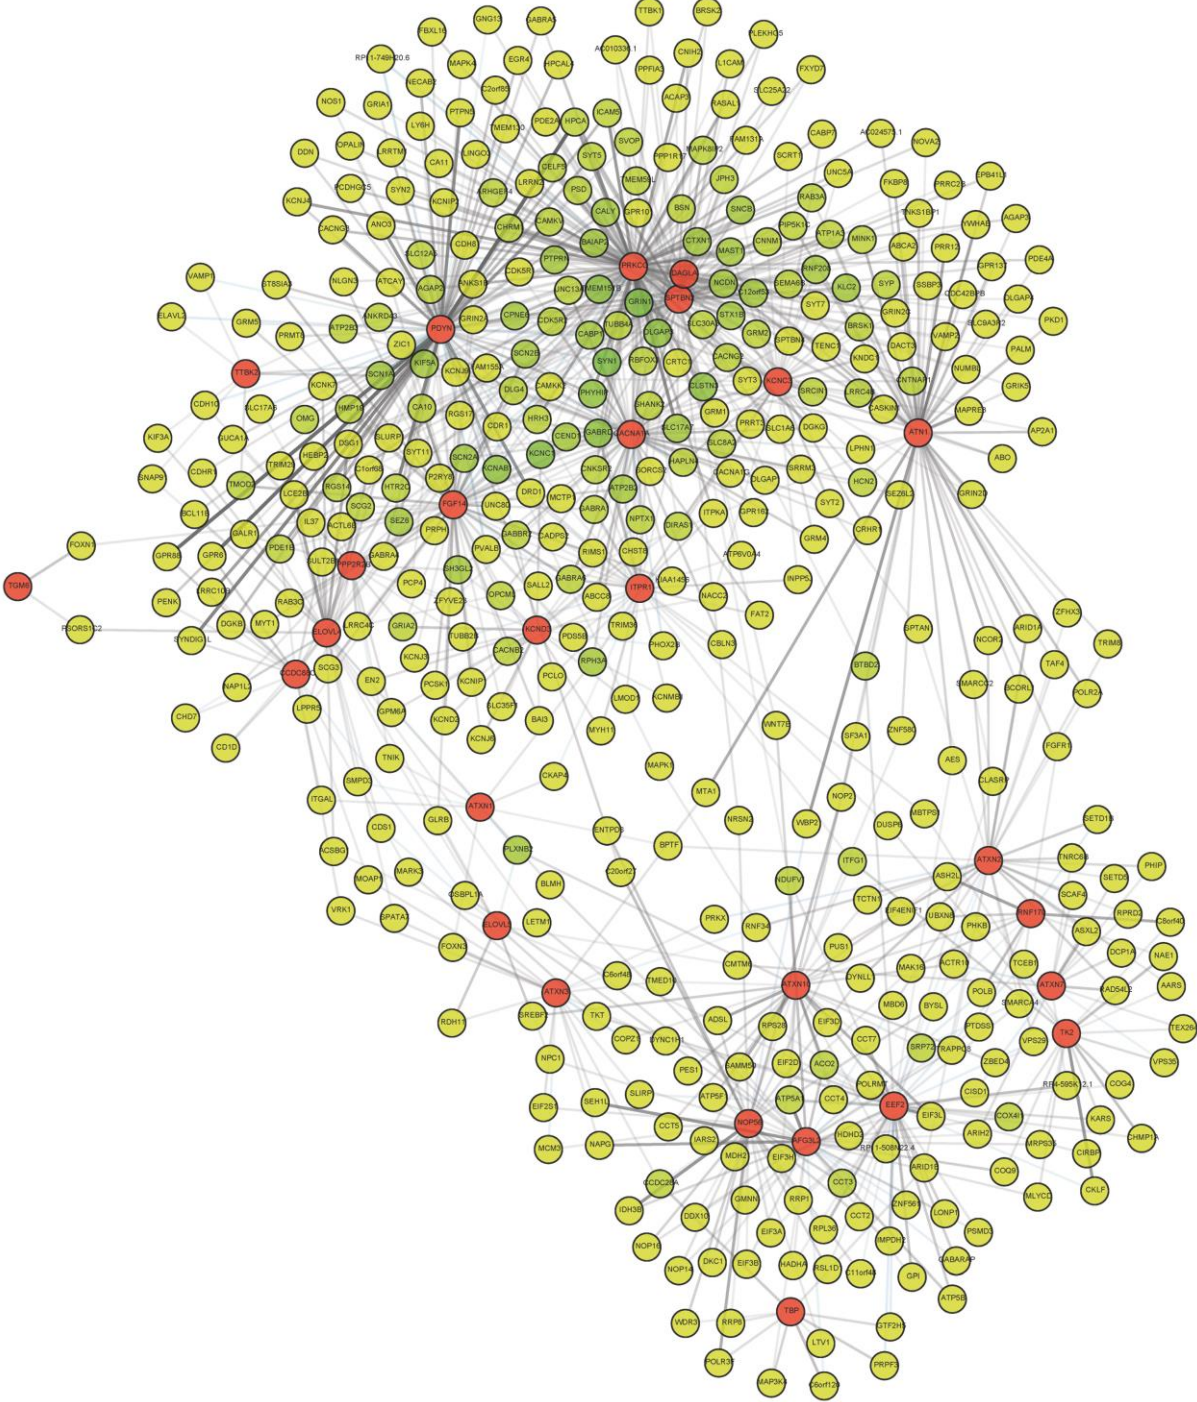

**Supplementary Figure 2. Gene co-expression network based on known dystonia genes.**

Red dots are the input genes (known dystonia genes). Yellow to green dots represent co-expressed genes, darker colored dots have more connections. The thickness of the line indicates the strength of co-expression.

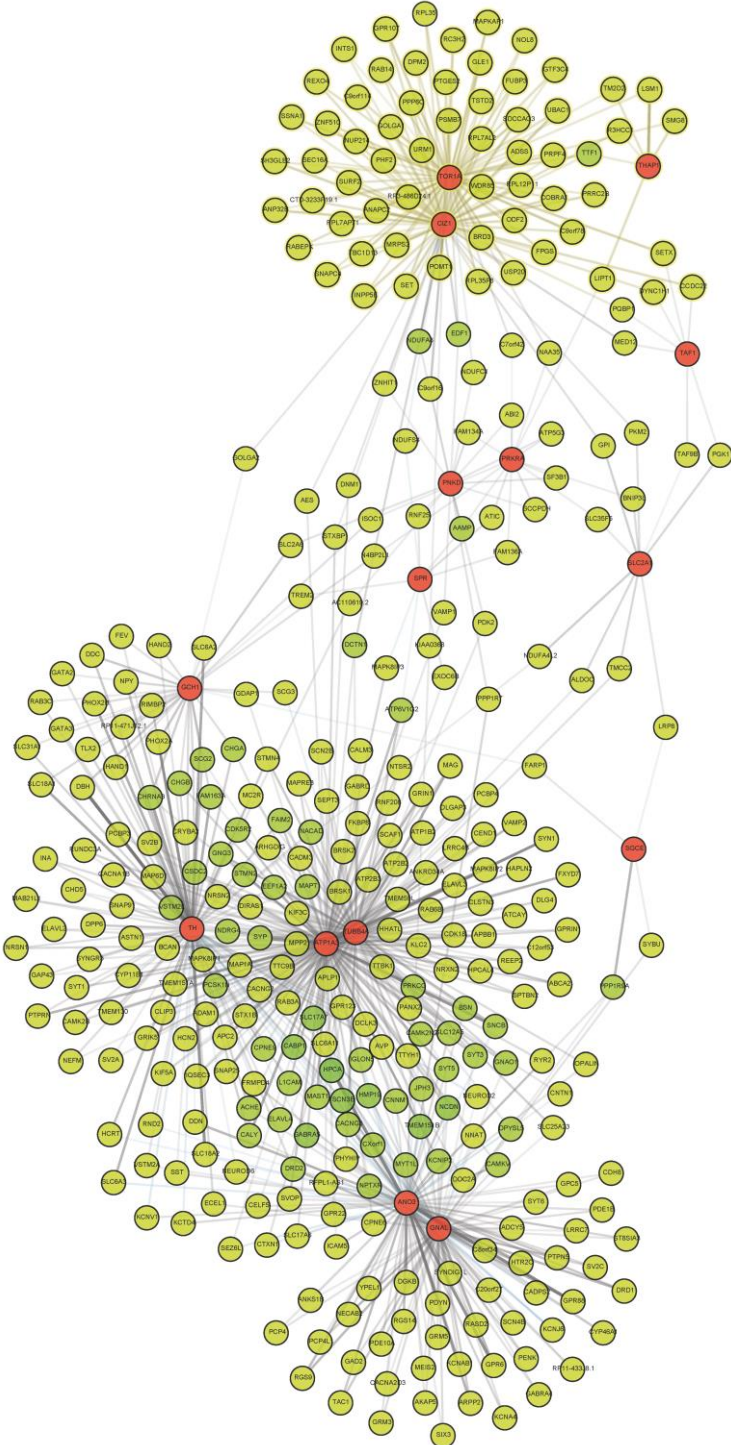

Supplement: NIHMS958624-supplement-Suppl.pdf [file NIHMS958624-supplement-Suppl.pdf]
